# Supplementary material for: The Biocontrol Root-Oomycete, Pythium Oligandrum, Triggers Grapevine Resistance and Shifts in the Transcriptome of the Trunk Pathogenic Fungus, Phaeomoniella Chlamydospora
Source: PubMed Central journal article supplement (PMC7555917; doi:10.3390/ijms21186876), 2020-09-19
Supplement: ijms-21-06876-s001.pdf [file ijms-21-06876-s001.pdf]

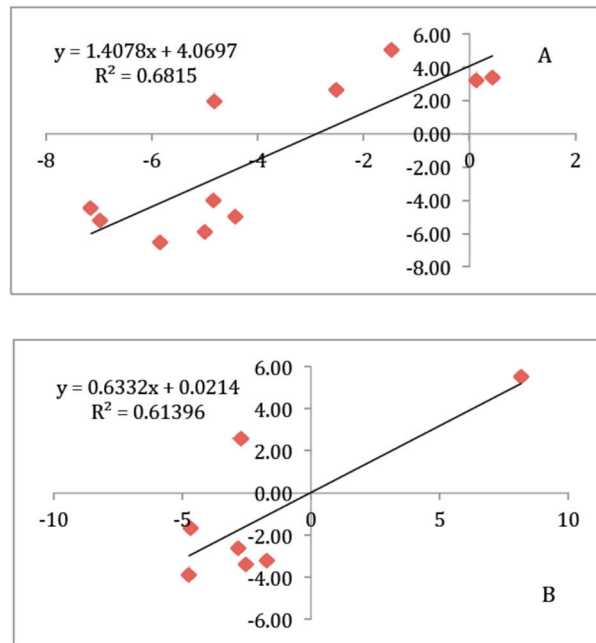

**Supplementary Figure 1** Comparison of microarray and qPCR expression levels  $\text{Log}_2(\text{FC})$  by regression analysis. **(A)** Samples treated with *Pythium oligandrum* Po2 and *Phaeoconiella chlamydospora* SO37; **(B)** Mock-inoculated plants. Each red point represents one studied gene (related to ABC transporter, auxin binding protein, cytochrome P450, expansin, GDSL lipase, dioxygenase (gibberelin), glycosyl transferase, auxin responsive protein, naringenin dioxygenase, polygalacturonase, terpene synthase et glycosyl transferase for the A condition/ABC transporter, allene oxide cyclase, cytochrome P450, expansin, dioxygenase (gibberelin), auxin responsive protein, polygalacturonase, phospholipase et glycosyl transferase for the B condition).

**Supplementary Table 1** Genes used for microarray validation by RT-qPCR.

| Gene identifier*<br>V0 - 12X<br>V1 - 12X        | Name                        | Mapman functional<br>category                                                                | Sens (5'>3')              | Anti-sens (3'>5')           |
|-------------------------------------------------|-----------------------------|----------------------------------------------------------------------------------------------|---------------------------|-----------------------------|
| chr11_jgvv16_101_t01<br>Vv11s0016g01220         | Auxin binding protein       | 20.2.99stress.abiotic.unspecif<br>ied                                                        | CAAGTGAATGGGGCTGGGA<br>T  | AAGGATCTGGAGACCAGG<br>CT    |
| chr18_jgvv1_77_t01<br>Vv18s0001g01130           | Expansin                    | 10.7cell wall.modification                                                                   | GGTGGACTAAAGCTCACGCT      | AATGCTGTGCTCAAAGCTG<br>C    |
| chr5_jgvv20_35_t01<br>Vv05s0020g00420           | Polygalacturona-se          | 10.6.3cell<br>wall.degradation.pectate<br>lyases and<br>polygalacturonases                   | TCAACAATCTTCTCCGGCCC      | TTCCGCTTCCTGTGAAGGT<br>C    |
| chr7_jgvv31_232_t01<br>Vv07s0031g02550          | ABC transporter             | 34.16 transport.ABC<br>transportersand multidrug<br>resistance systems                       | TTCGTGGCTCAGAAGGACAC      | ATCAACTGTGCCGGAGGA<br>AG    |
| chr14_jgvv66_158_t01<br>Vv14s0066g01730         | Glycosyl transferase        | 10.2 cell- wall.cellulose<br>synthesis                                                       | GTCCTACATGGCTTGGCTGT      | CGGGCTTCAACTTCTTGTG<br>C    |
| chr1_jgvv11_349_t01<br>Vv01s0011g03090          | Allene oxide cyclase        | 17.7.1.4 hormone<br>metabolism.jasmonate.synth<br>esis degradation.allene<br>oxidase cyclase | CTGAGTCAGAAGCCAGCCA<br>A  | CTCCAGGTCTCCGGTGTAG<br>A    |
| chr10_jgvv3_374_t01<br>Vv10s0003g04200          | Phospholipase               | 11.9.2.1 lipid<br>metabolism.lipid<br>degradation.lipases.triacylg<br>lycerol lipase         | TCTGGCTCAGTTGGAGTGC       | GCTGATTCCGGAGAGCTGT<br>T    |
| chr13_random_jgvv123_27_t<br>01 Vv13s0067g03700 | Terpenoid Synthase          | 16.1.5 secondary<br>metabolism.isoprenoids.terp<br>enoids                                    | ATGGAGATGGGCATGGTGT<br>C  | TGACAACITTTCTAGACCAG<br>GGG |
| chr18_jgvv1_338_t01<br>Vv18s0001g06090          | Glycosyl transferase        | 26.2 misc.UDP glucosyl and<br>glucuronyl transferases                                        | GGCCTTGGAGTGAAGACTC       | TCGCTGAGTTGGGACATTC<br>G    |
| chr19_jgvv140_8_t01<br>Vv19s0140g00120          | Dioxygenase                 | 17.6.1.13 hormone<br>metabolism.gibberelin.synth<br>esis degradation.GA2<br>oxidase          | ACGTGTTCTCCAAAGCCCT       | TGGCAGGCTTCAATGAGG<br>AG    |
| chr2_jgvv25_272_t01<br>Vv02s0025g02960          | Dioxygenase                 | 17.5.1 hormone<br>metabolism.ethylene.synthes<br>is degradation                              | CGCAACCAGAGCTGACCTAT      | TTAAGACCTGCAACCCAG<br>GC    |
| chr3_jgvv91_89_t01<br>Vv03s0091g00310           | Auxin responsive<br>protein | 17.2.3 hormone<br>metabolism.auxin.induced<br>regulated responsive<br>activated              | CCGAGAAGGATGCAAAAAGC<br>G | GACCGTTGACCCTTCCAGT<br>T    |
| chr6_jgvv80_106_t01<br>Vv06s0080g00090          | Cytochrome P450             | 26.10 misc.cytochromeP450                                                                    | CTTTCTCGCCATCTTGGGT       | GAGCTCCAGACTCGCCATT<br>T    |
| chr9_jgvv2_42_t01<br>Vv09s0002g00570            | GDSL lipase                 | 26.28 misc.GDSL motif<br>lipase                                                              | TAGGGCCTCTGGGTGTGTA       | TTTGAATCTGGGTAGGCGG<br>G    |

\* *Vitis vinifera* sequencing has produced several versions: 8X, 12X V0, 12X V1

**Supplementary Table 2** Genes used as reference in RT-qPCR analyses

| Gene identifier *<br>V0 - 12X<br>V1 - 12X | Name                                            | Mapman functional<br>category                                 | Sens (5'>3')           | Anti-sens (3'>5')    |
|-------------------------------------------|-------------------------------------------------|---------------------------------------------------------------|------------------------|----------------------|
| chr17_jgvv0_5_t01<br>Vv17s0000g10430      | Glyceraldehyde-<br>3-phosphate<br>dehydrogenase | 4.9<br>glycolysis.glyceraldehyde3-<br>phosphate dehydrogenase | GGCGTCGCCCAGATCGTGAT   | AGGCCGAGAAGGGTGACCGG |
| chr5_jgvv20_398_t01<br>Vv05s0020g04250    | Mitosis protein<br>dim1                         | 35.1 not assigned.no<br>ontology                              | ACCTTCACTCTGGATGGGCCGT | CCCAATCGTGGCCGAACCGA |
| chr6_jgvv4_524_t01<br>Vv06s0004g02820     | Sand protein                                    | 35.1 not assigned.no<br>ontology                              | CGGGGTCGCAAACGGATCGT   | GCCCCGTCCCCAGCATAGC  |

\* *Vitis vinifera* sequencing has produced several versions: 8X, 12X V0, 12X V1
